# Supplementary material for: Evaluation Tool Development for Food Literacy Programs
Source: PubMed Central journal article supplement (PMC6267114; doi:10.3390/nu10111617), 2018-11-02
Supplement: nutrients-10-01617-s001.pdf [file nutrients-10-01617-s001.pdf]

**Food Sensations Start of Program Questions**      **Initials:** \_\_\_\_\_

These questions ask about how you plan and prepare food for you and/or your family.

This is not a test! There are no wrong answers. Think about how you usually do things.

**1. How often have you done the following actions in the last month?** Please put a tick or circle in the box that is the best answer for each question.

|                                                             |       |           |                  |        |
|-------------------------------------------------------------|-------|-----------|------------------|--------|
| Plan meals ahead of time?                                   | Never | Sometimes | Most of the time | Always |
| Make a list before you go shopping?                         | Never | Sometimes | Most of the time | Always |
| Plan meals to include all food groups?                      | Never | Sometimes | Most of the time | Always |
| Think about healthy food choices when deciding what to eat? | Never | Sometimes | Most of the time | Always |

|                                                               |       |           |                  |        |
|---------------------------------------------------------------|-------|-----------|------------------|--------|
| Run out of money for food?                                    | Never | Sometimes | Most of the time | Always |
| Feel confident about managing your money to buy healthy food? | Never | Sometimes | Most of the time | Always |

|                                                               |       |           |                  |        |
|---------------------------------------------------------------|-------|-----------|------------------|--------|
| Use a nutrition information panel to make food choices?       | Never | Sometimes | Most of the time | Always |
| Use other parts of a food label to make food choices?         | Never | Sometimes | Most of the time | Always |
| Compare prices of foods to find best prices on healthy foods? | Never | Sometimes | Most of the time | Always |

|                                                          |       |           |                  |        |
|----------------------------------------------------------|-------|-----------|------------------|--------|
| Cook meals at home using healthy ingredients?            | Never | Sometimes | Most of the time | Always |
| Feel confident about cooking a variety of healthy meals? | Never | Sometimes | Most of the time | Always |
| Try a new recipe?                                        | Never | Sometimes | Most of the time | Always |
| Change recipes to make them healthier?                   | Never | Sometimes | Most of the time | Always |
| Thaw meat at room temperature?                           | Never | Sometimes | Most of the time | Always |

**2. What do you think of the following statements?**

|                                                    |                   |          |          |       |                |
|----------------------------------------------------|-------------------|----------|----------|-------|----------------|
| Healthy foods cost more than unhealthy foods?      | Strongly Disagree | Disagree | Not Sure | Agree | Strongly Agree |
| Food has an impact on future health and wellbeing? | Strongly Disagree | Disagree | Not Sure | Agree | Strongly Agree |

**3. Do you have responsibility for choosing and preparing the household meals?**

- Yes all the responsibility  1
- Yes but share the responsibility  2
- No responsibility  3

**4. Do you have responsibility for doing the household food shopping?**

- Yes all the responsibility  1
- Yes but share the responsibility  2
- No responsibility  3

**5. Which of the following best describes your cooking skills?**

- Can cook almost anything  1
- Can cook a wide variety of meals  2
- Can cook basic meat and 3 vegetables  3
- Can do basic heating food, use barbeque, boil egg  4
- Can't cook/Don't cook  5

**6. How many serves of fruit do you usually eat each day?**

1 serve of fruit is equal to 1 medium piece or 1 cup diced or canned fruit

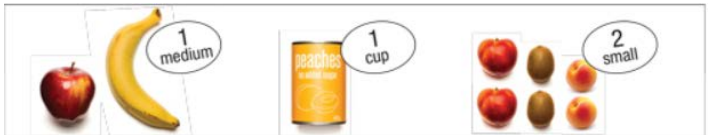

|           |           |         |              |          |              |          |              |          |              |                  |
|-----------|-----------|---------|--------------|----------|--------------|----------|--------------|----------|--------------|------------------|
| no serves | 1/2 serve | 1 serve | 1 1/2 serves | 2 serves | 2 1/2 serves | 3 serves | 3 1/2 serves | 4 serves | 4 1/2 serves | 5 or more serves |
|-----------|-----------|---------|--------------|----------|--------------|----------|--------------|----------|--------------|------------------|

**7. How many serves of vegetables do you usually eat each day?**

1 serve of vegetables is equal to 1/2 cup of cooked vegetables or 1 cup of salad

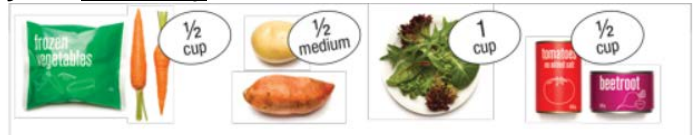

|           |           |         |              |          |              |          |              |          |              |                  |
|-----------|-----------|---------|--------------|----------|--------------|----------|--------------|----------|--------------|------------------|
| no serves | 1/2 serve | 1 serve | 1 1/2 serves | 2 serves | 2 1/2 serves | 3 serves | 3 1/2 serves | 4 serves | 4 1/2 serves | 5 or more serves |
|-----------|-----------|---------|--------------|----------|--------------|----------|--------------|----------|--------------|------------------|

**8. How many times a week on average do you eat fast food meals, such as burgers, pizza, chicken or chips from fast food outlets?**

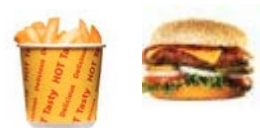

|              |                       |                     |                     |                        |
|--------------|-----------------------|---------------------|---------------------|------------------------|
| Never/rarely | Less than once a week | 1 or 2 times a week | 3 or 4 times a week | 5 or more times a week |
|--------------|-----------------------|---------------------|---------------------|------------------------|

**9. How many times a week on average do you drink regular soft drink (not diet), energy drinks, sports drinks, flavoured mineral water or vitamin water?**

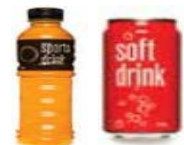

|              |                       |                     |                     |                        |
|--------------|-----------------------|---------------------|---------------------|------------------------|
| Never/rarely | Less than once a week | 1 or 2 times a week | 3 or 4 times a week | 5 or more times a week |
|--------------|-----------------------|---------------------|---------------------|------------------------|

**10. Why did you come to this program today? (tick as many options as you need)**

- Learn about healthy eating and nutrition  <sub>1</sub>
- Learn to cook or improve confidence with cooking skills  <sub>2</sub>
- Make healthier meals  <sub>3</sub>
- Get new ideas for cooking  <sub>4</sub>
- Learn to read food labels  <sub>5</sub>
- Improve food budgeting  <sub>6</sub>
- Make healthier snacks and lunchboxes for children  <sub>7</sub>
- Other reason/s \_\_\_\_\_

**11. These questions help us describe who is attending *Food Sensations*.**

**Are you?** Male  <sub>1</sub> Female  <sub>2</sub>

**How old are you?**

18-25  <sub>1</sub> 26-35  <sub>2</sub> 36-45  <sub>3</sub> 46-55  <sub>4</sub> 56-65  <sub>5</sub> 66 and over  <sub>6</sub>

**What is your postcode?** \_\_\_\_\_

**Who lives in your house?**

Live alone  <sub>1</sub> Live with partner, no children  <sub>2</sub> Single parent living with children  <sub>3</sub>  
Live with partner and children  <sub>4</sub> Shared house  <sub>5</sub> Supported accommodation  <sub>6</sub>  
Extended family  <sub>7</sub> other \_\_\_\_\_

**What is the highest level of education you have completed?**

Primary or some high school  <sub>1</sub> Finished high school (leaving)  <sub>2</sub> Trade/apprenticeship  <sub>3</sub>  
Certificate or diploma  <sub>4</sub> Bachelor degree or higher  <sub>5</sub> other \_\_\_\_\_

**What is your employment status?**

Full-time  <sub>1</sub> Part-time  <sub>2</sub> Casual  <sub>3</sub> Unemployed  <sub>4</sub> Unable to work  <sub>5</sub>  
Household duties  <sub>6</sub> Retired  <sub>7</sub> Volunteer  <sub>8</sub> Other \_\_\_\_\_

**Where you born in Australia?**

Yes  <sub>1</sub> No  <sub>2</sub>

**Do you identify as Aboriginal or Torres Strait Islander?**

Yes  <sub>1</sub> No  <sub>2</sub>

**Please check you have answered all the questions!**

**Thank you for completing this questionnaire and please return to the Foodbank WA staff member.**

## Food Sensations End of Program Questions

Initials: \_\_\_\_\_

These questions ask about how you plan and prepare food for you and/or your family.

This is not a test! There are no wrong answers. Think about how you usually do things.

**1. How often have you done the following actions in the last month?** Please put a tick or circle in the box that is the best answer for each question.

|                                                             |       |           |                  |        |
|-------------------------------------------------------------|-------|-----------|------------------|--------|
| Plan meals ahead of time?                                   | Never | Sometimes | Most of the time | Always |
| Make a list before you go shopping?                         | Never | Sometimes | Most of the time | Always |
| Plan meals to include all food groups?                      | Never | Sometimes | Most of the time | Always |
| Think about healthy food choices when deciding what to eat? | Never | Sometimes | Most of the time | Always |

|                                                               |       |           |                  |        |
|---------------------------------------------------------------|-------|-----------|------------------|--------|
| Run out of money for food?                                    | Never | Sometimes | Most of the time | Always |
| Feel confident about managing your money to buy healthy food? | Never | Sometimes | Most of the time | Always |

|                                                               |       |           |                  |        |
|---------------------------------------------------------------|-------|-----------|------------------|--------|
| Use a nutrition information panel to make food choices?       | Never | Sometimes | Most of the time | Always |
| Use other parts of a food label to make food choices?         | Never | Sometimes | Most of the time | Always |
| Compare prices of foods to find best prices on healthy foods? | Never | Sometimes | Most of the time | Always |

|                                                          |       |           |                  |        |
|----------------------------------------------------------|-------|-----------|------------------|--------|
| Cook meals at home using healthy ingredients?            | Never | Sometimes | Most of the time | Always |
| Feel confident about cooking a variety of healthy meals? | Never | Sometimes | Most of the time | Always |
| Try a new recipe?                                        | Never | Sometimes | Most of the time | Always |
| Change recipes to make them healthier?                   | Never | Sometimes | Most of the time | Always |
| Thaw meat at room temperature?                           | Never | Sometimes | Most of the time | Always |

## 2. What do you think of the following statements?

|                                                    |                   |          |          |       |                |
|----------------------------------------------------|-------------------|----------|----------|-------|----------------|
| Healthy foods cost more than unhealthy foods?      | Strongly Disagree | Disagree | Not Sure | Agree | Strongly Agree |
| Food has an impact on future health and wellbeing? | Strongly Disagree | Disagree | Not Sure | Agree | Strongly Agree |

**3. What were the goals you set yourself at the beginning of the program?**

---



---



---

**4. What changes have you made based on your goals?**

---



---



---

**5. How many serves of fruit do you usually eat each day?**

1 serve of fruit is equal to 1 medium piece or 1 cup diced or canned fruit

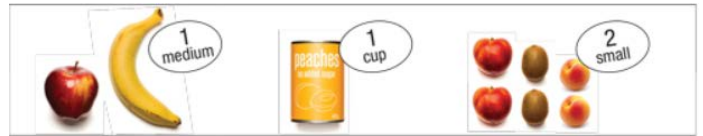

|           |           |         |              |          |              |          |              |          |              |                  |
|-----------|-----------|---------|--------------|----------|--------------|----------|--------------|----------|--------------|------------------|
| no serves | 1/2 serve | 1 serve | 1 1/2 serves | 2 serves | 2 1/2 serves | 3 serves | 3 1/2 serves | 4 serves | 4 1/2 serves | 5 or more serves |
|-----------|-----------|---------|--------------|----------|--------------|----------|--------------|----------|--------------|------------------|

**6. How many serves of vegetables do you usually eat each day?**

1 serve of vegetables is equal to 1/2 cup of cooked vegetables or 1 cup of salad

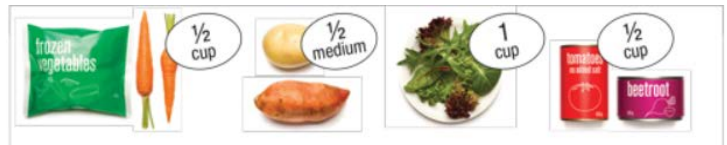

|           |           |         |              |          |              |          |              |          |              |                  |
|-----------|-----------|---------|--------------|----------|--------------|----------|--------------|----------|--------------|------------------|
| no serves | 1/2 serve | 1 serve | 1 1/2 serves | 2 serves | 2 1/2 serves | 3 serves | 3 1/2 serves | 4 serves | 4 1/2 serves | 5 or more serves |
|-----------|-----------|---------|--------------|----------|--------------|----------|--------------|----------|--------------|------------------|

**7. How many times a week on average do you eat fast food meals, such as burgers, pizza, chicken or chips from fast food outlets?**

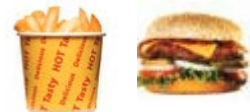

|              |                       |                   |                     |                        |
|--------------|-----------------------|-------------------|---------------------|------------------------|
| Never/Rarely | Less than once a week | 1 or times a week | 3 or 4 times a week | 5 or more times a week |
|--------------|-----------------------|-------------------|---------------------|------------------------|

**8. How many times a week on average do you drink regular soft drink (not diet), energy drinks, sports drinks, flavoured mineral water or vitamin water?**

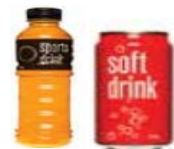

|              |                       |                     |                     |                        |
|--------------|-----------------------|---------------------|---------------------|------------------------|
| Never/Rarely | Less than once a week | 1 or 2 times a week | 3 or 4 times a week | 5 or more times a week |
|--------------|-----------------------|---------------------|---------------------|------------------------|

**9. Have you shared any of the program materials with family or friends or others?**

Yes <sub>1</sub>

No <sub>2</sub>

Not yet <sub>3</sub>

**10. What have you liked most about the Food Sensations program?**

---

---

**11. Do you have any suggestions for improvement of the Food Sensations program?**

---

---

**We would like to contact you in 3 months' time to ask about your experiences with Food Sensations. This survey will only take 5- 10 minutes.**

**You can enter into a draw to win a \$200 voucher if you complete all questionnaires. This draw will happen every three months.**

Please provide your name and contact details.

Name: \_\_\_\_\_

Phone Number: \_\_\_\_\_

Email: \_\_\_\_\_

Or prefer to be sent a paper survey with replied paid envelope

Mailing address: \_\_\_\_\_

---

**All details provided are confidential**

**Please check you have answered all questions!**

**Thank you for completing this survey and please return to the Foodbank WA staff member.**
